# Supplementary material for: Balancing economic and ecological functions in smallholder and industrial oil palm plantations
Source: PubMed Central journal article supplement — Proc Natl Acad Sci U S A. 2024 Apr 15;121(17):e2307220121. doi: 10.1073/pnas.2307220121 (PMC11047082; doi:10.1073/pnas.2307220121), 2024-04-15
Supplement: pnas.2307220121.sapp.pdf [file pnas.2307220121.sapp.pdf]

## Supplement figures

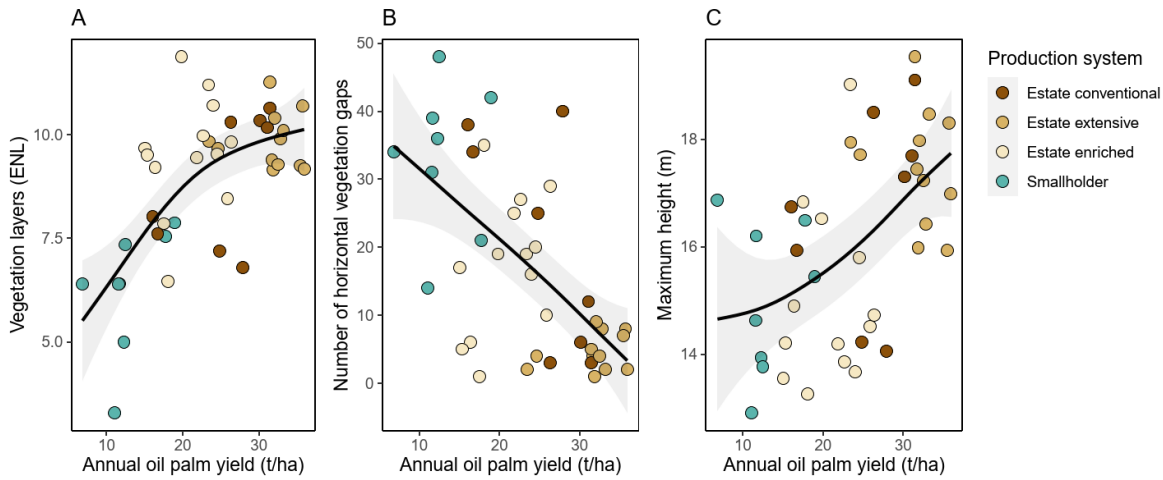

Fig S1: Airborne light detection and ranging (LiDAR) metrics plotted against annual oil palm yield: (A) effective number of vegetation layers, which describes vegetation structural complexity, (B) number of horizontal canopy gaps larger than 2.5 m<sup>2</sup> within the LiDAR point cloud (40x40 m), (C) maximum canopy height in meters. Point color indicates oil palm production systems. Mean general additive model predictions and 95 % confidence intervals are displayed ( $p < 0.05$ ).

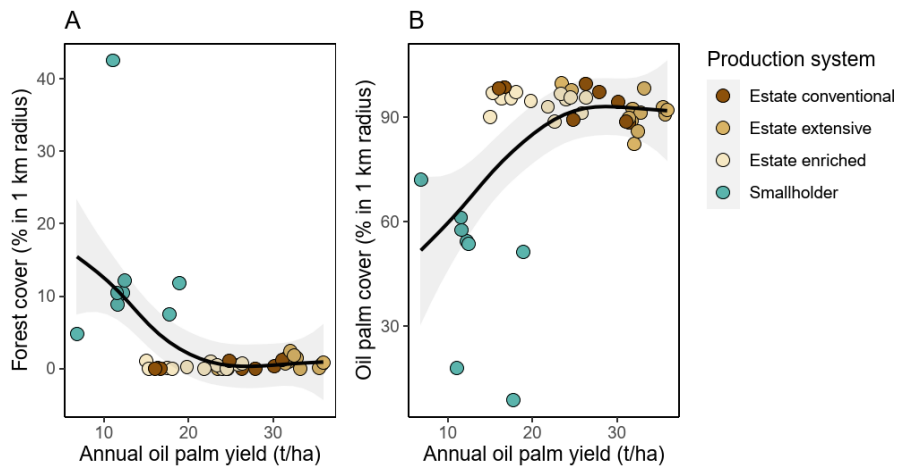

Fig S2: Surrounding forest (A) and mature oil palm cover (B) (in %) within a 1 km landscape buffer plotted against annual oil palm yield. Point color indicates oil palm production systems. Mean general additive model predictions and 95 % confidence intervals are displayed ( $p < 0.05$ ).

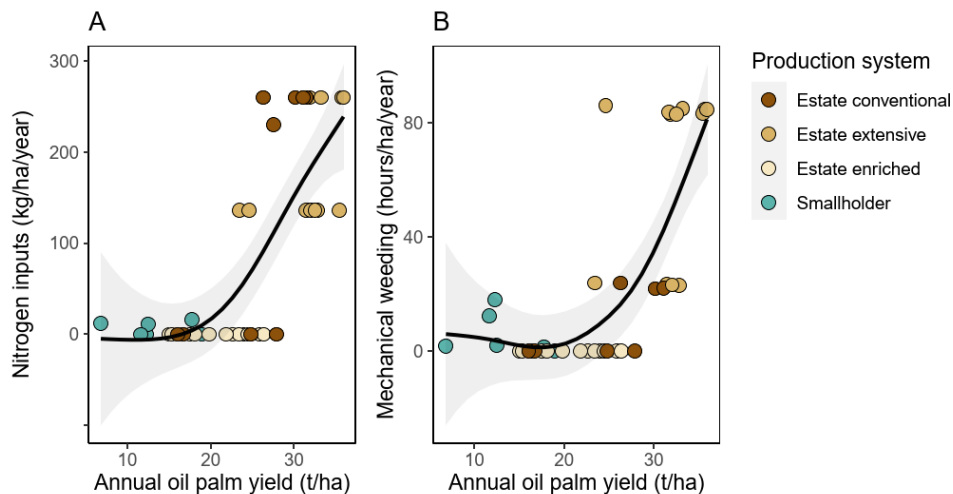

Fig S3: Nitrogen fertilization (kg per hectare and year) (A) and mechanical weeding effort (labor hours per hectare and year) (B) plotted against annual oil palm yield. Point color indicates oil palm production systems. Mean general additive model predictions and 95 % confidence intervals are displayed ( $p < 0.05$ ).

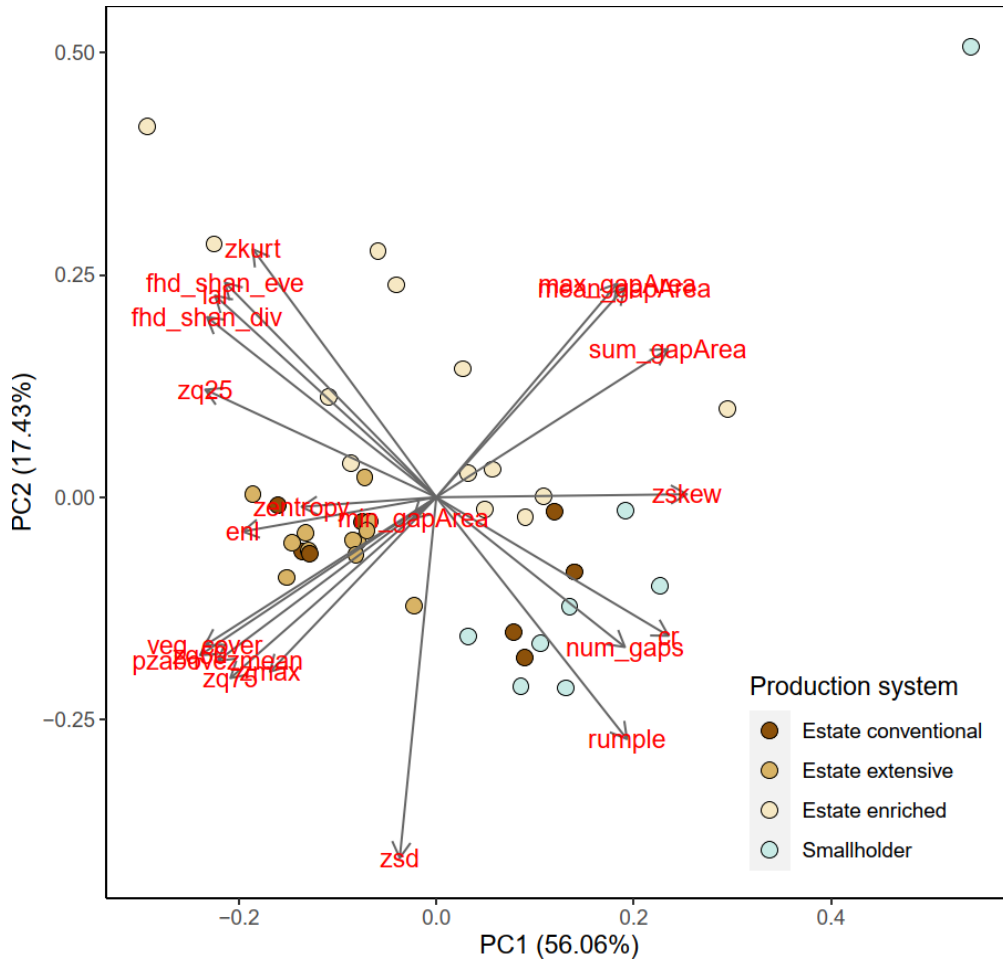

Fig S4: Principal component plot of airborne light detection and ranging (LiDAR) metrics describing vegetation structures considered in this study. We used this plot to identify groups of highly correlated metrics and to select a subset of LiDAR variables for further analysis. From this plot we selected 11 metrics: Effective number of layers (ENL), leaf area index (lai), height distribution kurtosis (zkurt), mean gap area (mean\_gap), total gap area (sum\_gap), height distribution skewness (zskew), number of gaps (num\_gaps), canopy roughness (rumple), height distribution standard deviation (zsd), maximum height (zmax) and vegetation cover (veg\_cover).

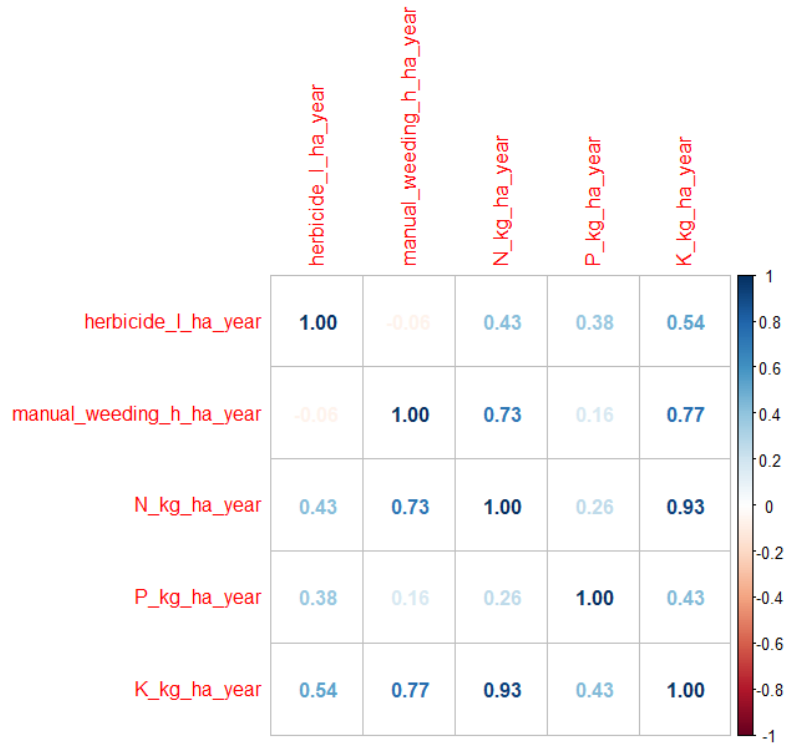

Fig S5: Spearman correlation matrix for management variables. Colors indicate strengths of correlations: the darker the color the stronger the correlation. Red indicates a positive and blue a negative correlation. From this plot we selected the following three management variables: Herbicide inputs (herbicide\_l\_ha\_year), mechanical weeding effort (manual\_weeding\_h\_ha\_year), phosphorus inputs (P\_kg\_ha\_year).

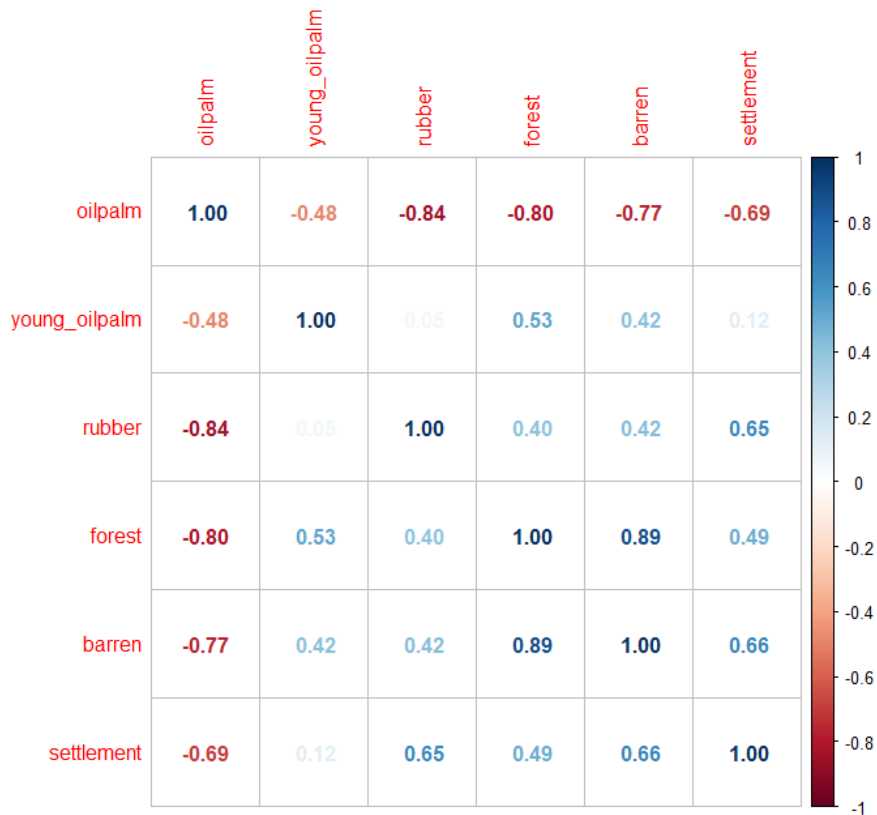

Fig S6: Spearman correlation matrix for landscape cover classes (% cover in a 1km radius around study sites). Colors indicate strengths of correlations: the darker the color the stronger the correlation. Red indicates a positive and blue a negative correlation. From this plot we selected the following three landscape variables: young oil palm plantations (young\_oilpalm), forest, rubber.

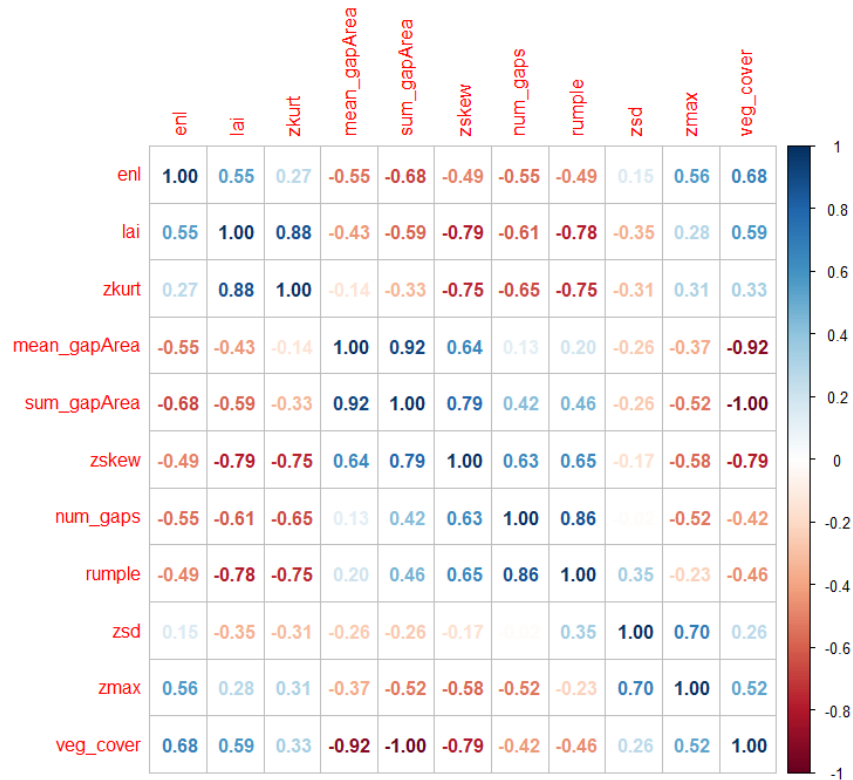

Fig S7: Spearman correlation matrix for LiDAR metrics. Colors indicate strengths of correlations: the darker the color the stronger the correlation. Red indicates a positive and blue a negative correlation. For a description of variables see Tab S1. From this plot we selected the following five metrics: effective number of layers (enl), leaf area index (lai), mean canopy gap area (mean\_gapArea), number of canopy gaps (num\_gaps), maximum height (zmax).

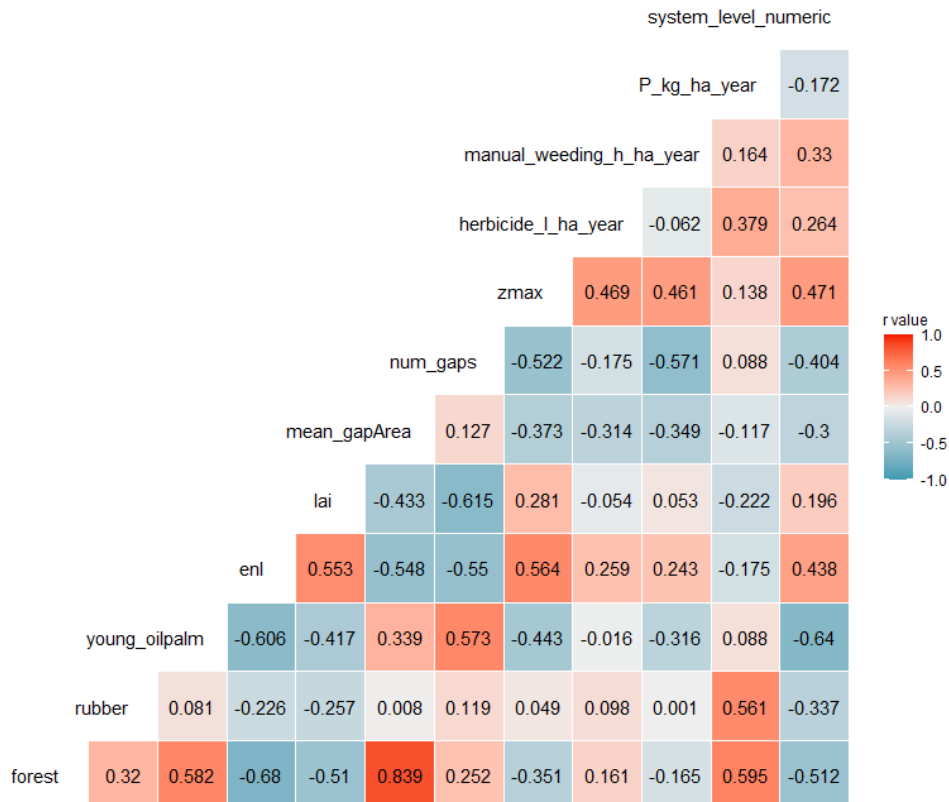

Fig S8: Spearman correlation matrix for all selected predictor variables, including their correlation to production system identity (coded as numeric values). Colors indicate strengths of correlations: the darker the color the stronger the correlation. Red indicates a positive and blue a negative correlation.

## Supplement tables

Tab S1: Overview and description of LiDAR variables considered in this study. Descriptions are taken from (25).

| <i>LiDAR metric</i> | <i>Description</i>                                                           |
|---------------------|------------------------------------------------------------------------------|
| cr                  | Canopy ratio, calculated as $(z_{\max} - z_{q25})/z_{\max}$                  |
| enl                 | Effective Number of Layers, a structural complexity index used in this study |
| fhd_shan_div        | Foliage Height Diversity, calculated as Shannon diversity                    |
| fhd_shan_eve        | Foliage Height Diversity, calculated as Shannon evenness                     |
| lai                 | Leaf area index                                                              |
| max_gapArea         | maximum gap size > 2.5 m                                                     |
| mean_gapArea        | minimum gap size > 2.5 m                                                     |
| min_gapArea         | minimum gap size > 2.5 m                                                     |
| num_gaps            | Total number of gaps in the canopy > 2.5 m                                   |
| pzabovemean         | Number of points above the mean height                                       |
| rumple              | Rumple index, a measure of top canopy surface roughness                      |
| sum_gapArea         | Total extent of gaps > 2.5 m                                                 |
| sum_gapArea         | Total extent of gaps > 2.5 m                                                 |
| veg_cover (%)       | Vegetation cover above 2.5 m                                                 |
| zentropy            | Entropy of height points                                                     |
| zkurt               | Kurtosis of height points                                                    |
| zmax (m)            | Maximum height within the LiDAR point cloud.                                 |
| zq25                | 25% quartile of height points                                                |
| zq75                | 75% quartile of height points                                                |
| zsd                 | Standard deviation of height points                                          |
| zskew               | Skewness of height points                                                    |

Tab S2: Regression table for a logistic model with the occurrence of win-win cases as response with the system identity as predictors. The estimated log odds, standard errors, 95 % confidence intervals, p-values and the per system probability of a win-win occurrence (calculated from estimated log-odds) are displayed. Significant p-values ( $p \leq 0.05$ ) are highlighted in bold.

| <b>Win-Win</b>                          |                                  |                                 |                  |                                   |
|-----------------------------------------|----------------------------------|---------------------------------|------------------|-----------------------------------|
| <i>Predictors<br/>(System identity)</i> | <i>Estimated<br/>Odds Ratios</i> | <i>Confidence<br/>intervals</i> | <i>p-values</i>  | <i>Probability of Win-win (%)</i> |
| (Intercept)                             | 0.31                             | 0.17 – 0.52                     | <b>&lt;0.001</b> | 23.6%                             |
| Estate conventional                     |                                  |                                 |                  |                                   |
| Estate enriched                         | 0.63                             | 0.31 – 1.30                     | 0.2              | 16.3%                             |
| Estate extensive                        | 2.41                             | 1.24 – 4.84                     | <b>0.011</b>     | 42.7%                             |
| Smallholders                            | 0.00                             | 0.00 – 0.00                     | 0.980            | 0%                                |

Tab S3: Correlations of environmental and management variables to the yield and ecological indicator axis of the global ordination plot, i.e. in which yields have been plotted against all standardized indicators. Displayed are the correlation coefficients ( $r$ ) to each individual axis and the corresponding goodness-of-fit statistic ( $r^2$ ) and p-values from permutation tests. Significant correlations ( $p > 0.05$ ) are displayed in bold.

| <i>Variable</i>    | <i>Correlation to yield axis</i> | <i>Correlation to ecological indicator axis</i> | <i><math>r^2</math></i> | <i>p-value</i> |
|--------------------|----------------------------------|-------------------------------------------------|-------------------------|----------------|
| Young oil palm     | -0.99                            | 0.13                                            | 0.38                    | <b>0.001</b>   |
| Forest             | -0.96                            | 0.26                                            | 0.26                    | <b>0.001</b>   |
| Rubber             | -0.59                            | 0.81                                            | 0.02                    | <b>0.031</b>   |
| Vegetation layers  | 1.00                             | -0.08                                           | 0.38                    | <b>0.001</b>   |
| Leaf area index    | 1.00                             | 0.02                                            | 0.02                    | <b>0.039</b>   |
| Vegetation gaps    | -1.00                            | -0.01                                           | 0.42                    | <b>0.001</b>   |
| Maximum height     | 1.00                             | 0.07                                            | 0.22                    | <b>0.001</b>   |
| Herbicides         | 0.99                             | 0.13                                            | 0.06                    | <b>0.001</b>   |
| Mechanical weeding | 0.99                             | 0.11                                            | 0.44                    | <b>0.001</b>   |
| Phosphorus         | 0.21                             | 0.98                                            | 0.02                    | <b>0.049</b>   |

Tab S4: Correlations of environmental and management variables to the yield and ecological indicator axis of individual ordination plot, i.e. in which yields have been plotted against each individual ecological indicator. Displayed are the correlation coefficients ( $r$ ) to each individual axis and the corresponding goodness-of-fit statistic ( $r^2$ ) and  $p$ -values from permutation tests.

| <i>Ecological indicator</i> | <i>Variable</i>    | <i>Correlation to yield axis</i> | <i>Correlation to indicator axis</i> | <i>p-value</i> |
|-----------------------------|--------------------|----------------------------------|--------------------------------------|----------------|
| Aboveground biomass         | Forest             | -0.73                            | 0.68                                 | 0.001          |
| Aboveground biomass         | Herbicides         | 1.00                             | -0.06                                | 0.334          |
| Aboveground biomass         | Leaf area index    | 0.46                             | -0.89                                | 0.559          |
| Aboveground biomass         | Mechanical weeding | 0.84                             | 0.54                                 | 0.001          |
| Aboveground biomass         | Maximum height     | 0.88                             | 0.48                                 | 0.003          |
| Aboveground biomass         | Phosphorus         | 0.31                             | 0.95                                 | 0.159          |
| Aboveground biomass         | Rubber             | -0.01                            | 1.00                                 | 0.175          |
| Aboveground biomass         | Vegetation gaps    | -1.00                            | 0.02                                 | 0.001          |
| Aboveground biomass         | Vegetation layers  | 0.90                             | -0.43                                | 0.001          |
| Aboveground biomass         | Young oil palm     | -0.95                            | 0.32                                 | 0.002          |
| Bacteria richness           | Forest             | 0.00                             | -1.00                                | 0.004          |
| Bacteria richness           | Herbicides         | 0.84                             | 0.55                                 | 0.323          |
| Bacteria richness           | Leaf area index    | -0.54                            | 0.84                                 | 0.126          |
| Bacteria richness           | Mechanical weeding | 0.86                             | 0.50                                 | 0.001          |
| Bacteria richness           | Maximum height     | -0.10                            | 1.00                                 | 0.001          |
| Bacteria richness           | Phosphorus         | 0.68                             | -0.73                                | 0.237          |
| Bacteria richness           | Rubber             | 0.57                             | -0.82                                | 0.271          |
| Bacteria richness           | Vegetation gaps    | -0.27                            | -0.96                                | 0.001          |
| Bacteria richness           | Vegetation layers  | 0.89                             | 0.45                                 | 0.001          |
| Bacteria richness           | Young oil palm     | -0.65                            | -0.76                                | 0.001          |
| Bird richness               | Forest             | -0.82                            | 0.57                                 | 0.002          |
| Bird richness               | Herbicides         | 0.33                             | 0.94                                 | 0.027          |
| Bird richness               | Leaf area index    | 0.18                             | 0.98                                 | 0.368          |
| Bird richness               | Mechanical weeding | 0.91                             | 0.41                                 | 0.001          |
| Bird richness               | Maximum height     | 0.82                             | 0.57                                 | 0.002          |
| Bird richness               | Phosphorus         | -0.18                            | 0.98                                 | 0.003          |
| Bird richness               | Rubber             | -0.38                            | 0.92                                 | 0.039          |
| Bird richness               | Vegetation gaps    | -0.86                            | -0.51                                | 0.001          |
| Bird richness               | Vegetation layers  | 1.00                             | 0.10                                 | 0.001          |
| Bird richness               | Young oil palm     | -1.00                            | -0.02                                | 0.001          |

|                         |                    |       |       |       |
|-------------------------|--------------------|-------|-------|-------|
| Decomposition           | Forest             | -0.08 | -1.00 | 0.001 |
| Decomposition           | Herbicides         | 0.76  | -0.65 | 0.148 |
| Decomposition           | Leaf area index    | -0.06 | 1.00  | 0.317 |
| Decomposition           | Mechanical weeding | 0.99  | -0.14 | 0.001 |
| Decomposition           | Maximum height     | 0.83  | 0.56  | 0.004 |
| Decomposition           | Phosphorus         | 0.42  | -0.91 | 0.002 |
| Decomposition           | Rubber             | 0.20  | -0.98 | 0.386 |
| Decomposition           | Vegetation gaps    | -0.84 | -0.55 | 0.001 |
| Decomposition           | Vegetation layers  | 0.99  | 0.12  | 0.002 |
| Decomposition           | Young oil palm     | -0.61 | -0.80 | 0.001 |
| Microclimatic stability | Forest             | -0.82 | -0.58 | 0.315 |
| Microclimatic stability | Herbicides         | 0.00  | 0.00  | 1     |
| Microclimatic stability | Leaf area index    | -0.50 | 0.87  | 0.115 |
| Microclimatic stability | Mechanical weeding | -0.71 | -0.71 | 0.062 |
| Microclimatic stability | Maximum height     | -0.97 | 0.25  | 0.467 |
| Microclimatic stability | Phosphorus         | -0.77 | 0.63  | 0.947 |
| Microclimatic stability | Rubber             | -0.71 | 0.70  | 0.931 |
| Microclimatic stability | Vegetation gaps    | 0.29  | -0.96 | 0.139 |
| Microclimatic stability | Vegetation layers  | 0.99  | 0.14  | 0.029 |
| Microclimatic stability | Young oil palm     | -0.02 | -1.00 | 0.247 |
| Phosphorus              | Forest             | -0.88 | 0.48  | 0.009 |
| Phosphorus              | Herbicides         | -0.65 | 0.76  | 0.414 |
| Phosphorus              | Leaf area index    | 0.86  | -0.51 | 0.942 |
| Phosphorus              | Mechanical weeding | -0.75 | 0.67  | 0.01  |
| Phosphorus              | Maximum height     | -0.99 | 0.16  | 0.807 |
| Phosphorus              | Phosphorus         | -0.37 | 0.93  | 0.047 |
| Phosphorus              | Rubber             | -0.90 | 0.44  | 0.682 |
| Phosphorus              | Vegetation gaps    | -1.00 | 0.01  | 0.622 |
| Phosphorus              | Vegetation layers  | 0.87  | -0.50 | 0.028 |
| Phosphorus              | Young oil palm     | -0.95 | 0.31  | 0.058 |
| Root fungi richness     | Forest             | -0.84 | 0.54  | 0.002 |
| Root fungi richness     | Herbicides         | -0.19 | -0.98 | 0.721 |
| Root fungi richness     | Leaf area index    | 0.79  | -0.62 | 0.001 |



|                     |                    |       |       |       |
|---------------------|--------------------|-------|-------|-------|
| Root fungi richness | Mechanical weeding | 1.00  | 0.08  | 0.009 |
| Root fungi richness | Maximum height     | 0.59  | -0.81 | 0.012 |
| Root fungi richness | Phosphorus         | -0.24 | 0.97  | 0.532 |
| Root fungi richness | Rubber             | -0.01 | 1.00  | 0.158 |
| Root fungi richness | Vegetation gaps    | -0.93 | 0.37  | 0.001 |
| Root fungi richness | Vegetation layers  | 0.88  | -0.47 | 0.001 |
| Root fungi richness | Young oil palm     | -0.88 | 0.48  | 0.001 |
| Soil fauna richness | Forest             | -0.43 | 0.90  | 0.001 |
| Soil fauna richness | Herbicides         | 0.91  | -0.41 | 0.312 |
| Soil fauna richness | Leaf area index    | -0.17 | -0.98 | 0.235 |
| Soil fauna richness | Mechanical weeding | 1.00  | -0.05 | 0.001 |
| Soil fauna richness | Maximum height     | 0.99  | -0.13 | 0.009 |
| Soil fauna richness | Phosphorus         | 0.53  | 0.85  | 0.088 |
| Soil fauna richness | Rubber             | 0.24  | 0.97  | 0.567 |
| Soil fauna richness | Vegetation gaps    | -0.78 | 0.63  | 0.001 |
| Soil fauna richness | Vegetation layers  | 0.97  | -0.25 | 0.002 |
| Soil fauna richness | Young oil palm     | -0.85 | 0.53  | 0.001 |
| Soil organic carbon | Forest             | -0.96 | 0.27  | 0.001 |
| Soil organic carbon | Herbicides         | 0.71  | 0.70  | 0.894 |
| Soil organic carbon | Leaf area index    | 0.99  | 0.14  | 0.001 |
| Soil organic carbon | Mechanical weeding | 0.99  | -0.16 | 0.003 |
| Soil organic carbon | Maximum height     | 0.97  | -0.23 | 0.032 |
| Soil organic carbon | Phosphorus         | -0.73 | 0.68  | 0.562 |
| Soil organic carbon | Rubber             | -0.95 | -0.32 | 0.446 |
| Soil organic carbon | Vegetation gaps    | -0.97 | 0.23  | 0.001 |
| Soil organic carbon | Vegetation layers  | 0.98  | 0.20  | 0.001 |
| Soil organic carbon | Young oil palm     | -0.99 | 0.13  | 0.001 |
| Transpiration       | Forest             | -0.82 | 0.57  | 0.011 |
| Transpiration       | Herbicides         | 0.99  | -0.14 | 0.927 |
| Transpiration       | Leaf area index    | 0.96  | 0.30  | 0.938 |
| Transpiration       | Mechanical weeding | -0.61 | -0.80 | 0.485 |
| Transpiration       | Maximum height     | -0.54 | -0.84 | 0.399 |
| Transpiration       | Phosphorus         | 0.07  | 1.00  | 0.33  |

|                                |                    |       |       |       |
|--------------------------------|--------------------|-------|-------|-------|
| Transpiration                  | Rubber             | 0.10  | 1.00  | 0.093 |
| Transpiration                  | Vegetation gaps    | -1.00 | 0.02  | 0.335 |
| Transpiration                  | Vegetation layers  | 1.00  | 0.00  | 0.044 |
| Transpiration                  | Young oil palm     | -0.93 | 0.36  | 0.03  |
| Understory vegetation richness | Forest             | -0.32 | 0.95  | 0.002 |
| Understory vegetation richness | Herbicides         | -0.84 | 0.55  | 0.206 |
| Understory vegetation richness | Leaf area index    | -0.28 | -0.96 | 0.111 |
| Understory vegetation richness | Mechanical weeding | 0.98  | -0.18 | 0.001 |
| Understory vegetation richness | Maximum height     | 0.45  | -0.89 | 0.002 |
| Understory vegetation richness | Phosphorus         | -0.62 | 0.79  | 0.668 |
| Understory vegetation richness | Rubber             | -0.60 | 0.98  | 0.712 |
| Understory vegetation richness | Vegetation gaps    | -0.60 | 0.80  | 0.001 |
| Understory vegetation richness | Vegetation layers  | 0.83  | -0.55 | 0.001 |
| Understory vegetation richness | Young oil palm     | -0.28 | 0.96  | 0.001 |

Tab S5: Regression table for linear model with surrounding landscape cover of forest and young oil palm (within a 1 km radius) response and with the system identity as predictor. The estimated log odds, 95 % confidence interval and p-values are displayed. Significant p-values ( $p \leq 0.05$ ) are highlighted in bold.

| <i>Predictors</i>                  | <b>Forest cover</b> |               |              | <b>Young oil palm cover</b> |              |                  |
|------------------------------------|---------------------|---------------|--------------|-----------------------------|--------------|------------------|
|                                    | <i>Estimates</i>    | <i>CI</i>     | <i>p</i>     | <i>Estimates</i>            | <i>CI</i>    | <i>p</i>         |
| (Intercept)<br>Estate conventional | -4.71               | -7.53 – -1.90 | <b>0.002</b> | 2.05                        | -0.94 – 5.04 | 0.174            |
| Estate extensive                   | 2.32                | -1.31 – 5.95  | 0.204        | -0.98                       | -4.85 – 2.88 | 0.610            |
| Estate enriched                    | 0.52                | -3.06 – 4.09  | 0.771        | 2.43                        | -1.38 – 6.23 | 0.204            |
| Smallholders                       | 7.11                | 3.13 – 11.09  | <b>0.001</b> | 12.01                       | 7.78 – 16.25 | <b>&lt;0.001</b> |

Tab S6: Comparing species richness of oil palm production systems to forest plots. Mean, max, and min richness for four taxonomic groups in oil palm, expressed as a percentage of forest mean, max and min richness is displayed. Note that soil amendments can favor bacteria and fungi in agricultural systems, explaining values exceeding 100% of forest richness for these groups. Across production systems, understory vegetation richness reached 11% of the mean forest richness, while bird richness attained 22% of the forest mean. The data from forest plots was extracted from Grass et al. (2022). Sampling protocols were either identical or very similar for the displayed groups (for further details see the original publication).

| <i>Taxa</i> | <i>Production system</i> | <i>Mean richness</i> | <i>% of forest</i> | <i>Max richness</i> | <i>% of forest</i> | <i>Min richness</i> | <i>% of forest</i> |
|-------------|--------------------------|----------------------|--------------------|---------------------|--------------------|---------------------|--------------------|
| Bacteria    | Estate conventional      | 3546                 | 159                | 4039                | 137                | 3001                | 188                |
|             | Estate extensive         | 3988                 | 179                | 4358                | 147                | 3638                | 228                |
|             | Estate enriched          | 3366                 | 151                | 3802                | 129                | 2574                | 161                |
|             | Smallholder upland       | 2692                 | 121                | 2887                | 98                 | 2530                | 158                |
| Fungi       | Estate conventional      | 293                  | 85                 | 412                 | 91                 | 169                 | 98                 |
|             | Estate extensive         | 326                  | 95                 | 422                 | 93                 | 233                 | 135                |
|             | Estate enriched          | -                    | -                  | -                   | -                  | -                   | -                  |
|             | Smallholder upland       | 462                  | 134                | 553                 | 122                | 366                 | 213                |
| Understory  | Estate conventional      | 18                   | 9                  | 26                  | 10                 | 11.4                | 9                  |
|             | Estate extensive         | 16                   | 8                  | 20.4                | 8                  | 12.4                | 10                 |
|             | Estate enriched          | 21                   | 10                 | 29                  | 11                 | 13                  | 11                 |
|             | Smallholder upland       | 31                   | 15                 | 46.8                | 18                 | 18.2                | 15                 |
| Birds       | Estate conventional      | 4                    | 22                 | 7                   | 24                 | 0                   | 0                  |
|             | Estate extensive         | 5                    | 28                 | 7                   | 24                 | 4                   | 36                 |
|             | Estate enriched          | 3                    | 17                 | 7                   | 24                 | 0                   | 0                  |
|             | Smallholder upland       | 4                    | 22                 | 6                   | 21                 | 2                   | 18                 |

Tab S7: Average (AVG), standard deviation (StDev) and standard error (SE) of air temperature (°C), air relative humidity (%), soil temperature (°C), and total accumulated precipitation (mm) at two reference meteorological stations (Bungku situated at Bukit Duabelas National Park and REKI situated in the Harapan rainforest) in the study region for three years. Air temperature and relative humidity were measured at a height of 2 m above the surface. Soil temperature was measured at a depth of 30 cm. Precipitation was measured at a height of 1.5 m above the surface.

|         | Humidity<br>(% in 2m height) |       | Air temperature<br>(°C in 2 m height) |       | Accumulated precipitation<br>(mm) |         | Soil temperature<br>(°C in 30cm) |       |
|---------|------------------------------|-------|---------------------------------------|-------|-----------------------------------|---------|----------------------------------|-------|
|         | Bungku                       | REKI  | Bungku                                | REKI  | Bungku                            | REKI    | Bungku                           | REKI  |
| 2013-14 |                              |       |                                       |       |                                   |         |                                  |       |
| AVG     | -                            | 89.32 | -                                     | 26.67 | -                                 | 2221.25 | -                                | 29.95 |
| StDev   | -                            | 13.80 | -                                     | 3.67  | -                                 | 0.49    | -                                | 0.93  |
| SE      | -                            | 0.06  | -                                     | 0.02  | -                                 | 0.00    | -                                | 0.00  |
| 2016-17 | Bungku                       | REKI  | Bungku                                | REKI  | Bungku                            | REKI    | Bungku                           | REKI  |
| AVG     | 89.56                        | 83.68 | 27.01                                 | 26.64 | 1685.55                           | 1418.50 | 30.33                            | 32.10 |
| StDev   | 14.32                        | 25.26 | 4.30                                  | 11.63 | 0.43                              | 0.39    | 0.73                             | 0.89  |
| SE      | 0.06                         | 0.11  | 0.02                                  | 0.05  | 0.00                              | 0.00    | 0.01                             | 0.00  |
| 2017-18 | Bungku                       | REKI  | Bungku                                | REKI  | Bungku                            | REKI    | Bungku                           | REKI  |
| AVG     | 89.73                        | -     | 26.70                                 | NA    | 1945.60                           | -       | 29.72                            | 33.26 |
| StDev   | 14.05                        | -     | 4.11                                  | NA    | 0.42                              | -       | 0.83                             | 8.64  |
| SE      | 0.06                         | -     | 0.02                                  | NA    | 0.00                              | -       | 0.00                             | 0.04  |
